# Supplementary material for: Carbon dot-modified mesoporous carbon as a supercapacitor with enhanced light-assisted capacitance
Source: Royal Society of Chemistry journal article supplement (doi:10.1039/d0nr05532h), 2020-01-01
Supplement: d0nr05532h1.pdf [file d0nr05532h1.pdf]

## Supporting Information

# Carbon dots modified mesoporous carbon as supercapacitor with enhanced the light- assisted capacitance

*Hui Wang,<sup>† §</sup> Jingjing Cao,<sup>† §</sup> Yunjie Zhou,<sup>†</sup> Zhenzhen Wang,<sup>†</sup> Yajie Zhao,<sup>†</sup> Yan Liu,<sup>†</sup>*

*Hui Huang,<sup>\*†</sup> Mingwang Shao,<sup>\*†</sup> Yang Liu,<sup>\*†</sup> Zhenhui Kang<sup>\*†</sup>*

<sup>†</sup>Institute of Functional Nano & Soft Materials (FUNSOM), Jiangsu Key Laboratory  
for Carbon-Based Functional Materials & Devices, Soochow University, 199 Ren'ai  
Road, Suzhou, 215123, Jiangsu, PR China

<sup>\*</sup>Corresponding authors. E-mail: [hhuang0618@suda.edu.cn](mailto:hhuang0618@suda.edu.cn); [mwshao@suda.edu.cn](mailto:mwshao@suda.edu.cn);  
[yangl@suda.edu.cn](mailto:yangl@suda.edu.cn); [zhkang@suda.edu.cn](mailto:zhkang@suda.edu.cn).

<sup>§</sup>These authors contributed equally.

## Supplementary figures

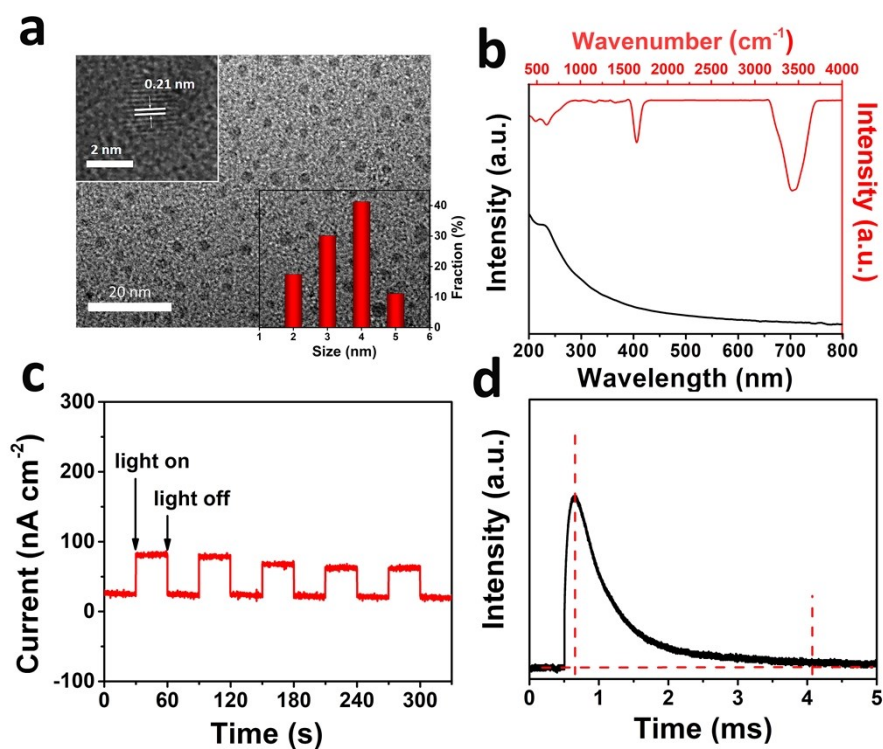

**Figure S1.** The typical morphology and characterization of CDs. (a) Typical TEM, HRTEM (left inset) images and corresponding size distributions (right inset) of CDs. (b) FTIR and UV-Vis spectra of CDs. (c) Transient photocurrent responses (TPR) of CDs. (d) Transient photovoltage (TPV) curve of CDs.

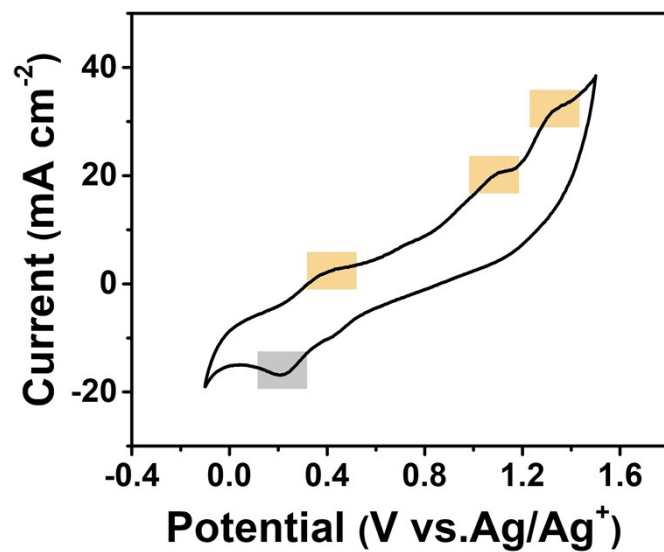

**Figure S2.** Cyclic voltammetry curves of CDs coated on glassy carbon electrodes in N<sub>2</sub> saturated anhydrous acetonitrile at 10 mV s<sup>-1</sup>.

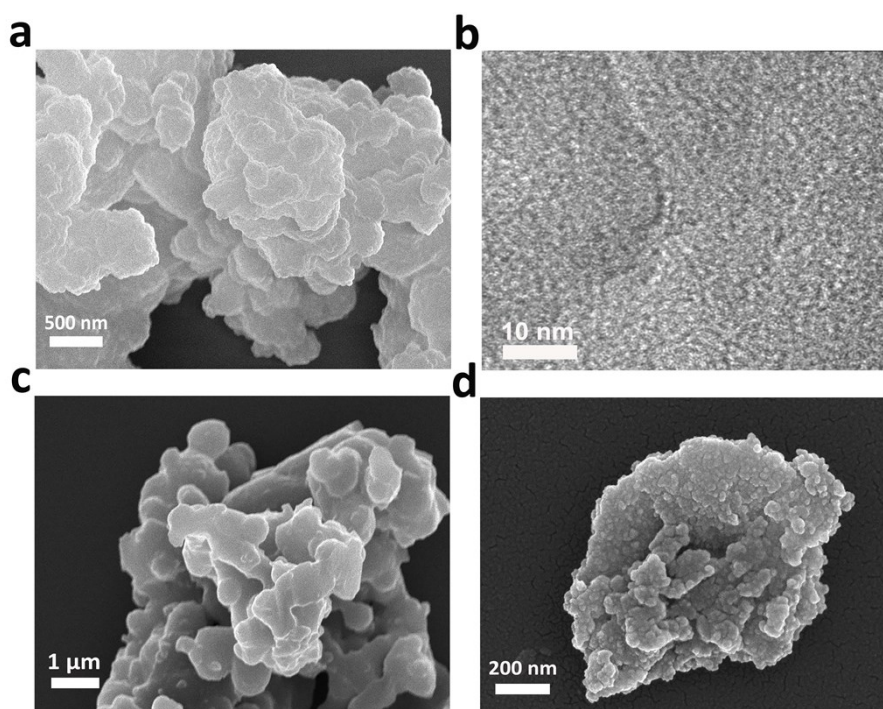

**Figure S3.** (a) SEM image of OPC-700. (b) TEM image of OPC-700. (c) SEM image of OPC-500. (d) SEM image of OPC-CDs-900.

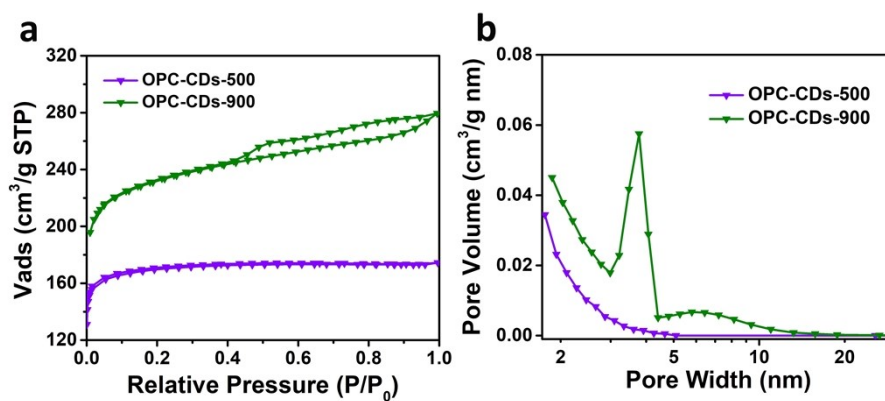

**Figure S4.** (a) Nitrogen adsorption-desorption isotherms and (b) corresponding pore size distribution curves of OPC-CDs-500 (purple trace) and OPC-CDs-900 (green trace).

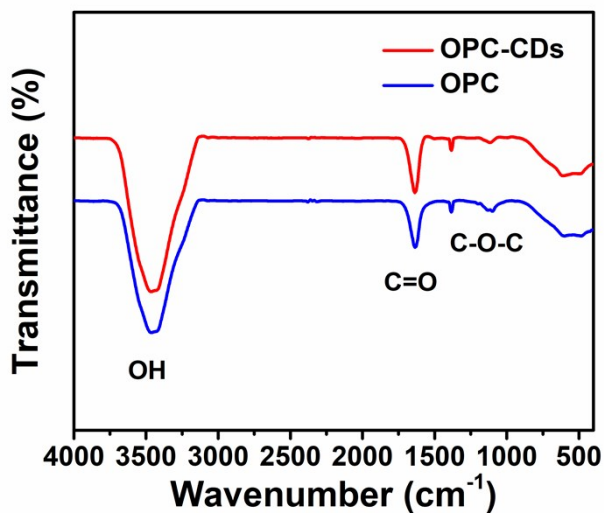

**Figure S5.** FTIR spectra of OPC-CDs-700 (red trace) and OPC-700 (blue trace).

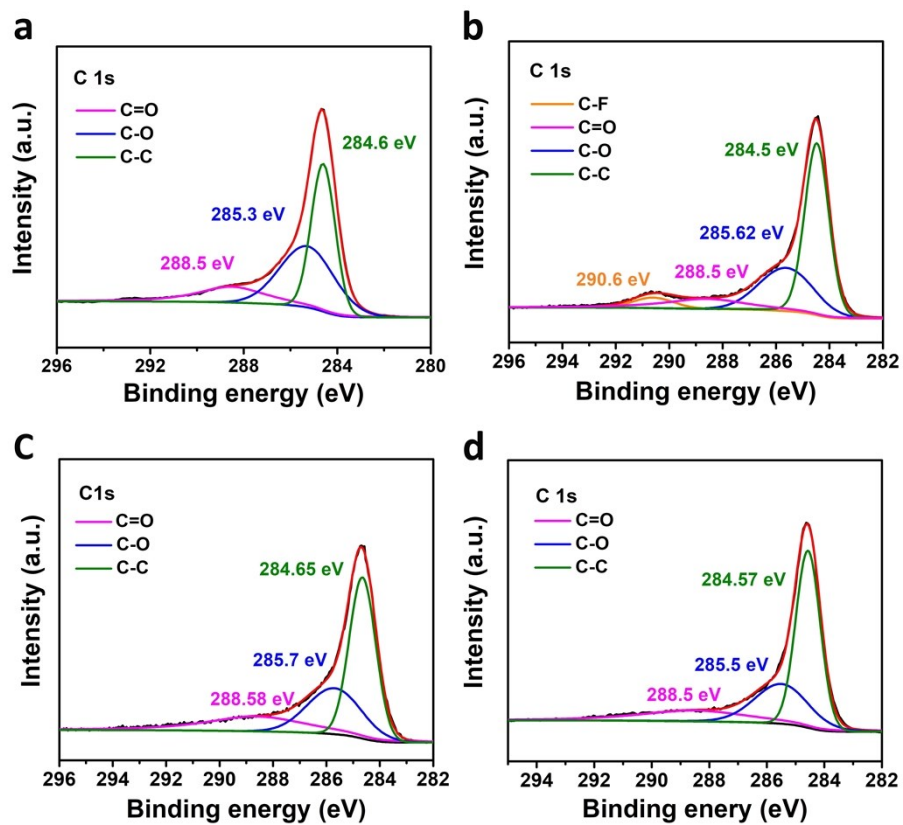

**Figure S6.** X-ray photoelectron spectroscopy (XPS) spectra of OPC-based powders. The corresponding C 1s spectra of (a) OPC-700, (b) OPC-CDs-700 after electrochemical test, (c) OPC-CDs-500, (d) OPC-CDs-900.

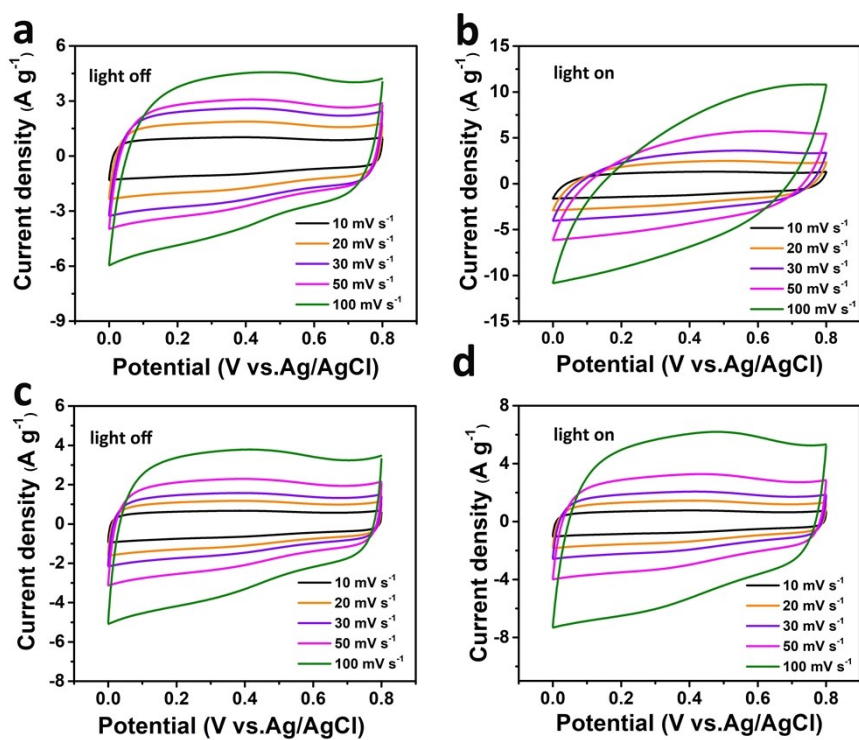

**Figure S7.** (a) and (b) are CV curves of the OPC-CDs-700 at various scan rates under dark and light illumination, respectively. (c) and (d) are CV curves of the OPC-700 at various scan rates under dark and light illumination, respectively.

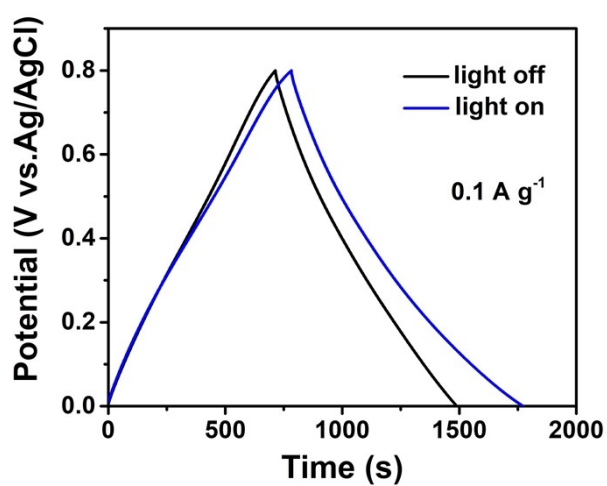

**Figure S8.** GCD curves of OPC-700 at 0.1 A g<sup>-1</sup> with/without light illumination.

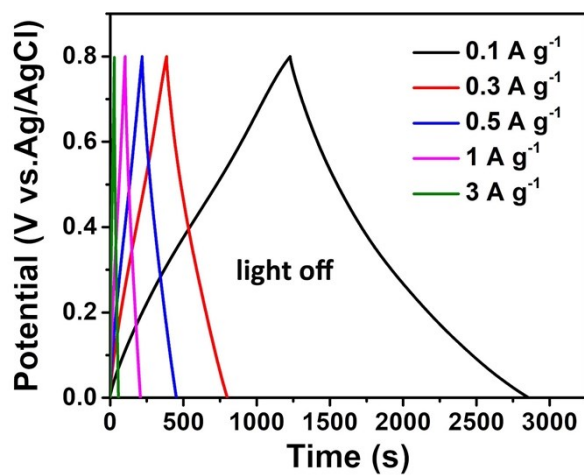

**Figure S9.** GCD curves of OPC-CDs-700 at different current densities under dark condition.

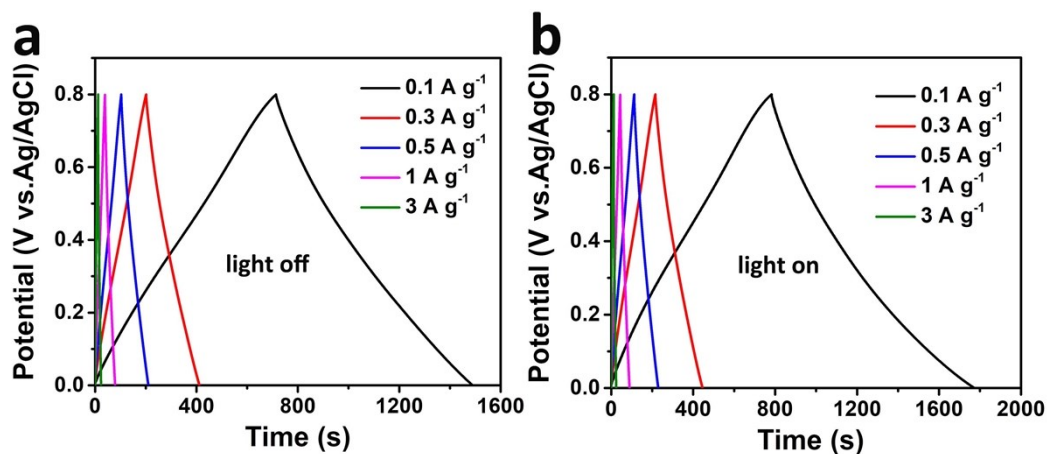

**Figure S10.** (a) and (b) are GCD curves of OPC-700 at different current densities under dark and light illumination, respectively.

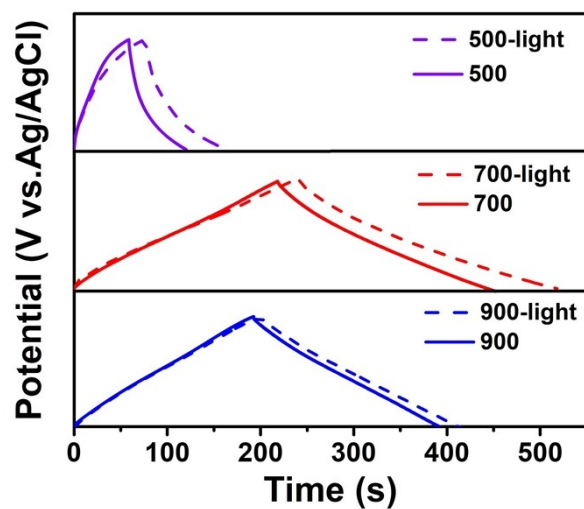

**Figure S11.** Comparison of GCD curves of OPC-CDs-500, OPC-CDs-700 and OPC-CDs-900 at  $0.5 \text{ A g}^{-1}$  under dark and light illumination.

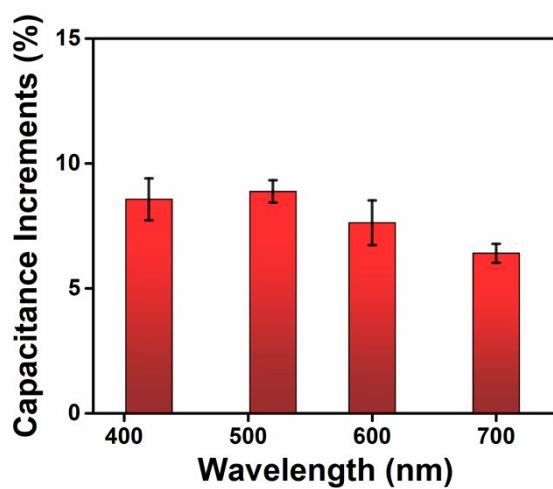

**Figure S12.** Increments of capacitance achieved under different wavelength of OPC-CDs-700 at  $0.5 \text{ A g}^{-1}$ .



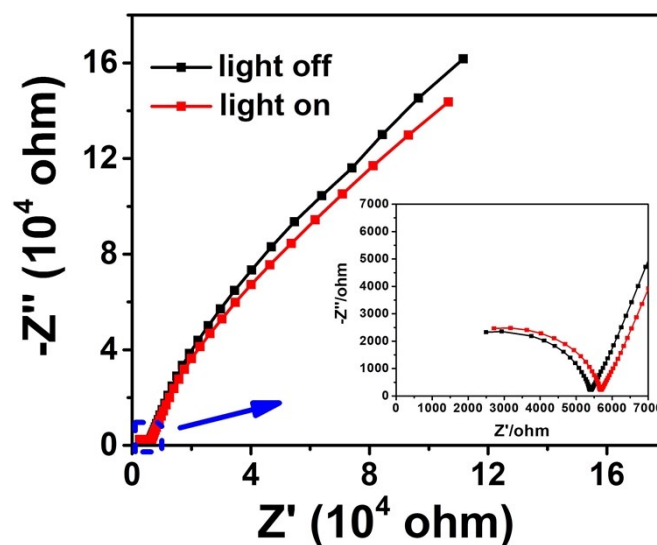

**Figure S13.** Nyquist plots of CDs electrode with/without light illumination.

**Table S1.** Activated carbon-based materials reported in the literatures applied for supercapacitor.

| Order | Material                                                               | Measurement protocol              | Electrolyte                            | Electrode configuration | Maximum specific capacitance | Reference       |
|-------|------------------------------------------------------------------------|-----------------------------------|----------------------------------------|-------------------------|------------------------------|-----------------|
| 1     | <b>OPC-CDs-700</b>                                                     | <b>GCD (0.1 A g<sup>-1</sup>)</b> | <b>3 M H<sub>2</sub>SO<sub>4</sub></b> | <b>3-electrode</b>      | <b>203 F/g</b>               | <b>Our work</b> |
| 2     | 3D carbon nanotubes/poly(3,4-ethylenedioxythiophene) sponge electrodes | GCD (0.5 A g <sup>-1</sup> )      | 1M LiClO <sub>4</sub>                  | 3-electrode             | 147 F/g                      | [1]             |
| 3     | OMCS                                                                   | GCD (0.2 A g <sup>-1</sup> )      | 6 M KOH                                | 3-electrode             | 173 F/g                      | [2]             |
| 4     | N <sub>3</sub> S-OMC                                                   | GCD (1 A g <sup>-1</sup> )        | 2 M KOH                                | 3-electrode             | 167 F/g                      | [3]             |
| 5     | N-OMC                                                                  | GCD (0.1 A g <sup>-1</sup> )      | 1 M H <sub>2</sub> SO <sub>4</sub>     | 3-electrode             | 216 F/g                      | [4]             |
| 6     | Nitrogen, oxygen and phosphorus decorated carbon                       | GCD (0.1 A g <sup>-1</sup> )      | 6M KOH                                 | 3-electrode             | 206 F/g                      | [5]             |
| 7     | Cross-linked carbon nanofibers                                         | GCD (0.5 A g <sup>-1</sup> )      | 6M KOH                                 | 3-electrode             | 222.9 F/g                    | [6]             |
| 8     | Nitrogen-doped porous carbon                                           | CV= -1-0 V                        | 6M KOH                                 | 3-electrode             | 223.9 F/g                    | [7]             |
| 9     | Microporous carbon                                                     | GCD (1 A g <sup>-1</sup> )        | 6M KOH                                 | 3-electrode             | 268 F/g                      | [8]             |

## References

- [1] X. He, W. Yang, X. Mao, L. Xu, Y. Zhou, Y. Chen, et al., All-solid state symmetric supercapacitors based on compressible and flexible free-standing 3D carbon nanotubes (CNTs)/poly(3,4-ethylenedioxythiophene) (PEDOT) sponge electrodes, *J. Power Sources* 376 (2018) 138-146.
- [2] X. Yu, J.-G. Wang, Z.-H. Huang, W. Shen, F. Kang, Ordered mesoporous carbon nanospheres as electrode materials for high-performance supercapacitors, *Electrochem Commun.* 36 (2013) 66e70.
- [3] D. Zhang, Y. Hao, L. Zheng, Y. Ma, H. Feng, H. Luo, Nitrogen and sulfur codoped ordered mesoporous carbon with enhanced electrochemical capacitance performance, *J. Mater Chem. A* 1 (2013) 7584e7591.
- [4] H. Chen, M. Zhou, Z. Wang, S. Zhao, S. Guan, Rich nitrogen-doped ordered mesoporous phenolic resin-based carbon for supercapacitors, *Electrochim Acta* 148 (2014) 187e194
- [5] J. Qu, C. Geng, S. Lv, G. Shao, S. Ma, M. Wu, Nitrogen, oxygen and phosphorus decorated porous carbons derived from shrimp shells for supercapacitors, *Electrochim. Acta* 176 (2015) 982-988.
- [6] J. Ding, X. Li, H.-P. Zhang, Y. Tang, G. Yang, Crosslinked carbon nanofiber films with hierarchical pores as flexible electrodes for high performance supercapacitors, *Mater. Des.* 141 (2018) 17-25.
- [7] S. Zhang, K. Tian, B.-H. Cheng, H. Jiang, Preparation of N-doped supercapacitor materials by integrated salt Templating and silicon hard templating by pyrolysis of biomass wastes, *ACS Sustain. Chem. Eng.* 5 (2017) 6682-6691.
- [8] J. Li, Q. Wu, Water bamboo-derived porous carbons as electrode materials for supercapacitors, *New J. Chem.* 39 (2015) 3859-3864.
